# Supplementary material
Source: Springer Nature journal article supplement (https://www.springermedizin.de/resource/supplementary/12974_2011_383_MOESM6_ESM.pdf/9601558)

**A**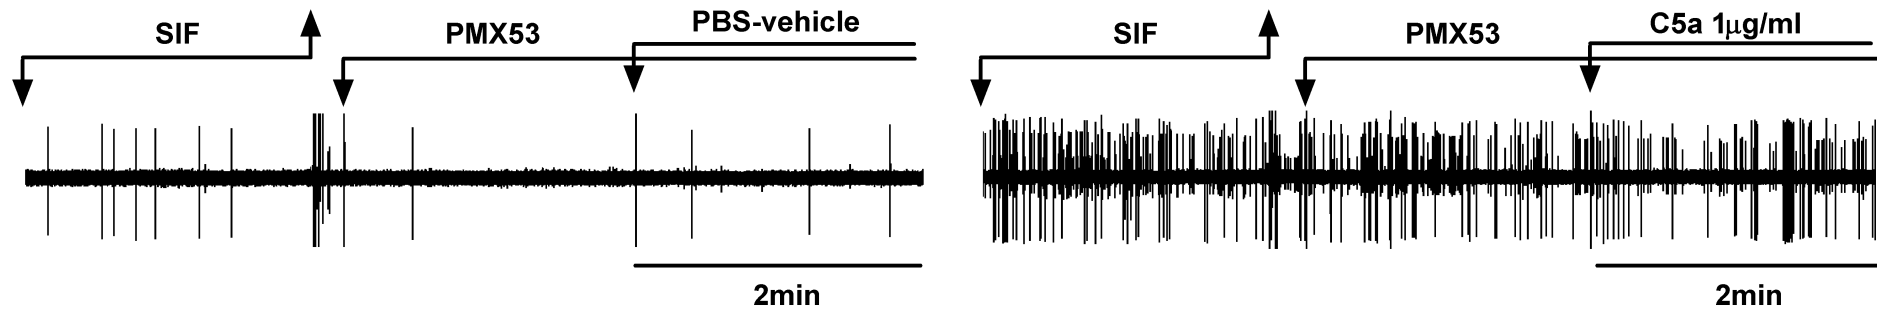**B**

Incision  
≤ 2mm

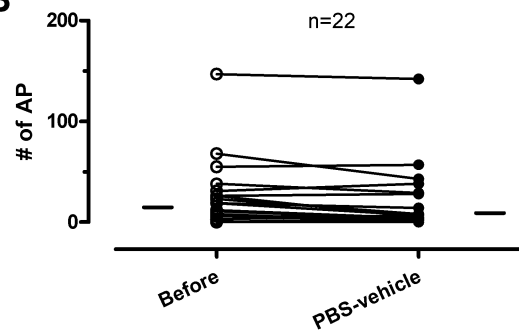**C**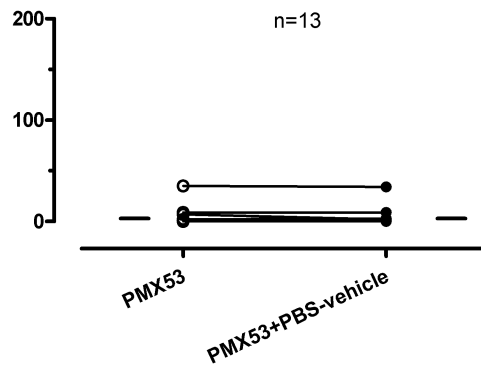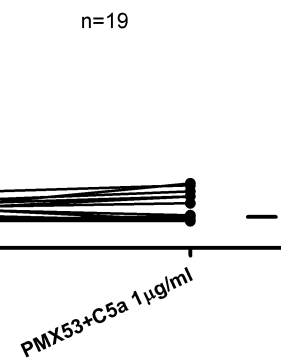**D**

Incision  
> 2mm

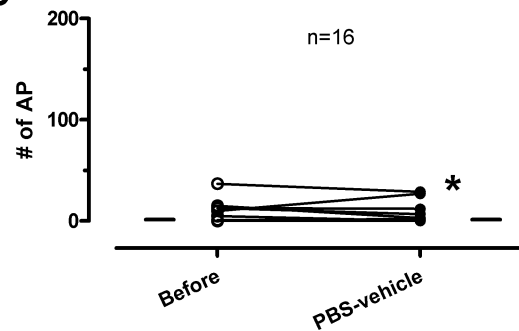**E**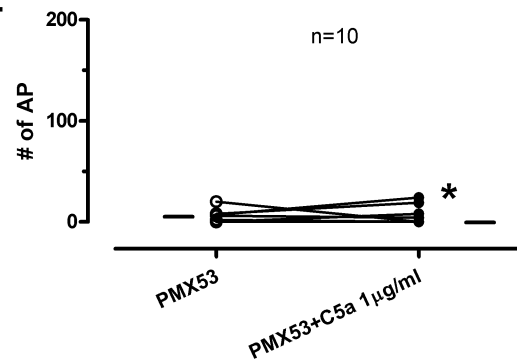

Supplement: MOESM6 [file 9601558]
